# Supplementary material for: Synthesis of High-Molecular-Weight Polyhydroxyalkanoates by Marine Photosynthetic Purple Bacteria
Source: PubMed Central journal article supplement (PMC4981452; doi:10.1371/journal.pone.0160981), 2016-08-11
Supplement: pone.0160981.s005.pdf [file pone.0160981.s005.pdf]

**S1 Table. Photosynthetic purple bacteria strains used in this study.**

| Resource number | Scientific name                                          | Growth temperature |
|-----------------|----------------------------------------------------------|--------------------|
| JCM14796        | <i>Allochromatium phaeobacterium</i>                     | 30°C               |
| JCM14262        | <i>Allochromatium renukae</i>                            | 28°C               |
| ATCC51935       | <i>Ectothiorhodospira haloalkaliphila</i>                | 30°C               |
| DSM241          | <i>Ectothiorhodospira marina</i>                         | 25°C               |
| DSM237          | <i>Ectothiorhodospira mobilis</i>                        | 35°C               |
| BRC14151        | <i>Halochromatium roseum</i>                             | 30°C               |
| DSM244          | <i>Halorhodospira halophila</i>                          | 25°C               |
| JCM17835        | <i>Halorhodospira neutriphila</i>                        | 30°C               |
| JCM13911        | <i>Marichromatium bheemlicum</i>                         | 28°C               |
| DSM1591         | <i>Marichromatium purpuratum</i>                         | 25°C               |
| JCM13533        | <i>Marichromatium sp.</i>                                | 26°C               |
| ATCC700894      | <i>Thiocapsa litoralis</i>                               | 26°C               |
| JCM14780        | <i>Thiohalocapsa marina</i>                              | 25°C               |
| JCM14889        | <i>Thiophageococcus mangrovi</i>                         | 30°C               |
| JCM14149        | <i>Thiorhodococcus bheemlicus</i>                        | 26°C               |
| JCM14150        | <i>Thiorhodococcus kakinadensis</i>                      | 28°C               |
| DSM19920        | <i>Rhodobaca barguzinensis</i>                           | 28°C               |
| JCM14544        | <i>Rhodobacter vinaykumarii</i>                          | 30°C               |
| JCM13532        | <i>Rhodobium gokarnense</i>                              | 26°C               |
| JCM9337         | <i>Rhodobium orientis</i>                                | 26°C               |
| ATCC BAA1145    | <i>Afifella pfennigii</i> ( <i>Rhodobium pfennigii</i> ) | 30°C               |
| DSM2698         | <i>Afifella marina</i> ( <i>Rhodobium marinum</i> )      | 25°C               |
| DSM2132         | <i>Rhodotalassium salexigens</i>                         | 26°C               |
| DSM2781         | <i>Rhodovulum adriaticum</i>                             | 26°C               |
| DSM4868         | <i>Rhodovulum euryhalinum</i>                            | 30°C               |
| JCM13300        | <i>Rhodovulum marinum</i>                                | 30°C               |

|              |                                      |      |
|--------------|--------------------------------------|------|
| JCM13589     | <i>Rhodovulum imhoffii</i>           | 28°C |
| ATCC35886    | <i>Rhodovulum sulfidophilum</i>      | 28°C |
| ATCC BAA1573 | <i>Rhodovulum tesquicola</i>         | 30°C |
| JCM13531     | <i>Rhodovulum visakhapatnamense</i>  | 30°C |
| BRC14191     | <i>Roseospira goensis</i>            | 28°C |
| ATCC BAA447  | <i>Roseospira marina</i>             | 26°C |
| ATCC BAA1365 | <i>Roseospira visakhapatnamensis</i> | 26°C |
