# Supplementary material for: Synthesis of High-Molecular-Weight Polyhydroxyalkanoates by Marine Photosynthetic Purple Bacteria
Source: PubMed Central journal article supplement (PMC4981452; doi:10.1371/journal.pone.0160981), 2016-08-11
Supplement: pone.0160981.s006.pdf [file pone.0160981.s006.pdf]

**S2 Table. Thermal properties of the purified PHAs.**

| Organism                       | $T_g$ (°C) | $T_m$ (°C) | Number-average<br>molecular weight (g/mol) | 3HB composition<br>(mol%) | 3HV composition<br>(mol%) |
|--------------------------------|------------|------------|--------------------------------------------|---------------------------|---------------------------|
| <i>Thc. marina</i>             | n.d.       | 172        | $645 \times 10^3$                          | 100                       | 0                         |
| <i>Tpc. mangrovi</i>           | -3         | 171        | $72 \times 10^3$                           | 100                       | 0                         |
| <i>Mch. bheemlicum</i>         | -1         | 174        | $994 \times 10^3$                          | 100                       | 0                         |
| <i>Rps. marina</i>             | n.d.       | 142        | $4 \times 10^3$                            | $93.9 \pm 5.3$            | $6.1 \pm 5.3$             |
| <i>Rdv. euryhalinum</i>        | -1         | 168        | $447 \times 10^3$                          | $97.2 \pm 0.9$            | $2.8 \pm 0.9$             |
| <i>Rdv. imhoffii</i>           | -2         | 165        | $570 \times 10^3$                          | $96.8 \pm 3.2$            | $3.2 \pm 3.2$             |
| <i>Rdv. sulfidophilum</i>      | -2         | 162        | $300 \times 10^3$                          | $92.6 \pm 1.6$            | $7.4 \pm 1.6$             |
| <i>Rdv. tesquicola</i>         | n.d.       | 165        | $504 \times 10^3$                          | $64.9 \pm 16.5$           | $35.1 \pm 16.5$           |
| <i>Rdv. visakhapatnamense</i>  | n.d.       | n.d.       | $713 \times 10^3$                          | $98.4 \pm 1.5$            | $1.6 \pm 1.5$             |
| <i>Ros. marina</i>             | n.d.       | 132        | $3 \times 10^3$                            | $70.6 \pm 7.0$            | $29.4 \pm 7.0$            |
| <i>Ros. goensis</i>            | n.d.       | 74         | $17 \times 10^3$                           | $34.0 \pm 8.9$            | $66.0 \pm 8.9$            |
| <i>Ros. visakhapatnamensis</i> | -4         | 159        | $147 \times 10^3$                          | $69.9 \pm 11.1$           | $30.1 \pm 11.1$           |

n.d., not detected.
